# Supplementary material
Source: MDPI journal article supplement (https://www.mdpi.com/2073-4441/15/23/4095)
Supplement: s1 [file s1]

**Table S1.** Classification criteria of water quality base on EWQI

| Level | EWQI    | Water quality  |
|-------|---------|----------------|
| 1     | <50     | excellent      |
| 2     | 50-100  | good           |
| 3     | 100-150 | medium         |
| 4     | 150-200 | poor           |
| 5     | >200    | extremely poor |

**Table S2.** Parameters for computing the health risks through oral intake and dermal contact exposure pathways.

| Parameters | units | Children | adult males | adult females | Parameters                 | units    | Children | adult males | adult females |
|------------|-------|----------|-------------|---------------|----------------------------|----------|----------|-------------|---------------|
| <i>K</i>   | cm/h  | 0.001    | 0.001       | 0.001         | <i>ED</i>                  | year     | 12       | 30          | 30            |
| <i>t</i>   | h/day | 0.4      | 0.4         | 0.4           | <i>AT</i>                  | day      | 4380     | 10950       | 10950         |
| <i>CW</i>  | mg/L  |          | -           | -             | <i>BW</i>                  | kg       | 26.8     | 59          | 69.6          |
| <i>IR</i>  | L/day | 1.25     | 1.95        | 1.95          | <i>EF</i> (oral)           | day/year | 365      | 365         | 365           |
| <i>CF</i>  | -     | 0.001    | 0.001       | 0.001         | <i>EF</i> (derm)           | day/year | 365      | 365         | 365           |
| <i>EV</i>  | -     | 1        | 1           | 1             | <i>RFD</i> <sub>oral</sub> | mg/kg-d  | 1.6      | 1.6         | 1.6           |
| <i>BH</i>  | cm    | 99.4     | 158.00      | 169.70        | <i>RfD</i> <sub>derm</sub> | mg/kg-d  | 1.6      | 1.6         | 1.6           |

**Table S3.** Classification of salt hazards in irrigation groundwater.

| Salinity Hazard level | EC (µs/cm) | Water quality      |
|-----------------------|------------|--------------------|
| C1                    | <250       | low salinity       |
| C2                    | 250-750    | medium salinity    |
| C3                    | 750-2250   | high salinity      |
| C4                    | >2250      | very high salinity |

**Table S4.** Results of non-carcinogenic risk through drinking water intake and dermal contact.

| Contaminant              | Children (CD) |          |      | Adult females (AF) |          |       | Adult males (AM) |          |      |
|--------------------------|---------------|----------|------|--------------------|----------|-------|------------------|----------|------|
|                          | Max.          | Min.     | Mean | Max.               | Min.     | Mean  | Max.             | Min.     | Mean |
| G1_HQ <sub>Nitrate</sub> | 1.26          | 7.87E-05 | 0.36 | 0.89               | 5.58E-05 | 0.25  | 0.76             | 4.73E-05 | 0.21 |
| G2_HQ <sub>Nitrate</sub> | 0.67          | 0.06     | 0.24 | 0.48               | 0.04     | 0.17  | 0.40             | 0.03     | 0.14 |
| G3_HQ <sub>Nitrate</sub> | 0.22          | 0.01     | 0.10 | 0.16               | 0.01     | 0.07  | 0.13             | 0.01     | 0.01 |
| HQ <sub>Nitrate</sub>    | 1.26          | 7.87E-05 | 0.29 | 0.890              | 5.58E-05 | 0.208 | 0.76             | 4.73E-05 | 0.18 |
| HI <sub>Total</sub>      | 1.26          | 7.92E-05 | 0.30 | 0.893              | 5.60E-05 | 0.209 | 0.76             | 4.75E-05 | 0.18 |
